# Supplementary material for: Assessment of the impact of dam reservoirs on river ice cover – an example from the Carpathians (central Europe)
Source: Copernicus journal article supplement (doi:10.5194/tc-2023-151), 2023-11-02
Supplement: Supplementary file [file tc-2023-151-RC1-supplement.pdf]

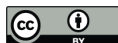

# 1 **Assessment of the impact of dam reservoirs on river ice cover - an** 2 **example from the Carpathians (central Europe)**

3 Maksymilian Fuks<sup>1</sup>

4 <sup>1</sup>Department of Geoenvironmental Research, Institute of Geography and Spatial Organization, Polish Academy of Sciences,  
5 Poland

6 *Correspondence to:* Maksymilian Fuks (fuksmaksymilian@twarda.pan.pl)

7  
8 **Abstract.** This paper presents a method for determining the impact of dam reservoirs on the ice cover of rivers **below** their  
9 locations based on a long measurement period (1950–2020) and synthetic-aperture radar (SAR) data. Two rivers and two  
10 sets of dam reservoirs located in the Carpathian Mountains (central Europe) were selected for this study. In order to estimate  
11 the influence of their reservoirs, a logistic regression model was built to describe the relationship between the course of air  
12 temperature and the occurrence of ice cover (i.e., total ice cover and border ice) at water gauge cross sections **above and**  
13 **below** the reservoirs. The influence of reservoirs was then defined as the differences between the **values** predicted from air  
14 temperature and those observed at the water gauge cross sections. Additionally, the extent of the impact of the reservoirs was  
15 estimated based on SAR data (Sentinel-1) by identifying river sections **below** the reservoirs on which total ice cover did not  
16 form despite the persistence of very low air temperatures. This study demonstrates that dam reservoirs are an important  
17 factor in transforming the ice regime of rivers. **We** found that decreases in the incidence of ice cover as a result of **their**  
18 operation could exceed 80% in the sections immediately below their location, and that this reduction decreased as the  
19 distance from the reservoir increases. **According to** SAR data, it was estimated that total ice cover did not form in sections  
20 26–60 kilometers below the reservoirs, **despite the presence of favorable thermal conditions**. **Based on the research results**  
21 **presented here, it is reasonable to assume that the rapid increase in the number of dam reservoirs worldwide in the second**  
22 **half of the 20<sup>th</sup> century is an important factor transforming the ice regime of rivers**. This study also demonstrates that the  
23 logistic regression model and SAR data are useful tools for assessing the impact of dam reservoirs on river ice cover.

## 24 **Keywords**

25 Dam reservoirs, river ice cover, logistic regression, synthetic aperture radar (SAR), Carpathians

## 26 **1. Introduction**

27  
28 Over the course of the 20<sup>th</sup> and 21<sup>st</sup> centuries, human impact on the natural environment has increased significantly. The  
29 transformation of the environment and its effects, previously occurring on a local scale, have now begun to be observed on a  
30 regional and global scale. The rapid increase in the impact of human activity since the 1950s has affected both biotic and  
31 abiotic aspects of the environment and has been dubbed the Great Acceleration (Lewis and Maslin, 2015). The section of the  
32



33 environment undergoing the most significant change is the terrestrial part of the Earth's cryosphere. This is mainly because  
34 of climate change and a significant increase in air temperature, particularly in cold areas (Fox-Kemper et al., 2021). Since the  
35 second half of the 20<sup>th</sup> century, there has been a decline in the extent and mass of ice sheets, mountain glaciers, and snow  
36 cover, as well as notable melting of permafrost (Fox -Kemper et al., 2021). Significant changes have also been observed in  
37 the river ice phenomena, which due to their periodic nature and the relatively small volume of river ice, are particularly  
38 sensitive to climatic variability and human influence (Newton and Mullan, 2021).

39 An anthropogenic element of the geographic environment that can significantly affect the ice regime of rivers are dam  
40 reservoirs. Such structures change the conditions for the course of ice processes in rivers, mainly through alterations in the  
41 flow volume and change in the thermodynamics of rivers **below** their location in winter (e.g., Starosolszky, 1990; Takács et  
42 al., 2013; Maheu et al., 2014; Takács and Kern, 2015; Pawłowski, 2015; Apsite et al., 2016; Chang et al., 2016). As a result  
43 of dam reservoir operation, an ice regime can be transformed over sections of several to even several hundred kilometers,  
44 sometimes causing the complete disappearance of ice phenomena (Maheu et al., 2014; Pawłowski, 2015; Chang et al., 2016).  
45 **Pawłowski (2015) showed that the construction of the Wloclawek dam reservoir on the Vistula River (Poland, Central**  
46 **Europe) resulted in a 26% reduction in the duration of ice cover and a 47% reduction in all ice phenomena below its**  
47 **location. Chang et al. (2016) showed that the construction of the Longyangxia and Liujiaxia reservoirs on the Yellow River**  
48 **(northern China) resulted in a reduction in the ice cover duration of the river by 8–33 days and a reduction in the thickness of**  
49 **the ice cover by 16–25 cm. This effect has also been noted in small rivers with small and medium-sized reservoirs. For**  
50 **example, Maheu et al. (2014) showed that the operation of small dam reservoirs in eastern Canada resulted in change in the**  
51 **thermal regime of rivers and the disappearance of ice phenomena in rivers over a distance of 0.3–2.5 km.**

52 Despite the significant role of dam reservoirs in transforming the ice regimes of rivers, the problem is relatively poorly  
53 recognized in many ways. **Most studies focus on assessing the impact of individual reservoirs, neglecting the regional and**  
54 **global aspects of this issue.** It has been estimated that there are more than 8,000 dam reservoirs in ice regime areas, most of  
55 which are located in central and northern Europe, eastern Asia and the central section of North America (Fukś, 2023). The  
56 main difficulty in assessing the impact of dam reservoirs on river ice cover comes in distinguishing whether changes are due  
57 to operational or climatic factors. So far, in order to study their impact, ice phenomena have been compared during periods  
58 with similar thermal conditions (usually determined by the average air temperature of winter) before and after the  
59 construction of reservoirs (e.g., Takács et al., 2013; Pawłowski, 2015; Chang et al., 2016). This approach makes it possible  
60 to assess the impact of reservoirs only on the basis of selected single years in which the **relevant thermal conditions occurred.**  
61 However, in order to accurately characterize the role of reservoirs in transforming the ice regime of rivers, it is necessary to  
62 conduct accurate, quantitative assessment of **their** impact on river ice cover for long periods. Another issue is the small  
63 number of studies based on remote sensing data (including radar) for relatively small mountain rivers, where the course of  
64 ice processes is poorly understood (Thellman et al. 2021). This results in poor understanding of the extent of the influence of  
65 dam reservoirs on river ice cover (especially small mountain rivers), making it difficult to estimate their role on a regional or  
66 global scale.



67 The main objective of this study is to determine the impact of Carpathian dam reservoirs on the ice cover of rivers below  
68 their locations based on long observation series and radar (SAR) imaging. Specific objectives include: (1) develop and  
69 present a method to quantitatively assess the impact of dam reservoirs on the duration of ice cover based on measurement  
70 data from water gauge cross sections; (2) estimate the extent of their impact based on satellite radar imagery (SAR) and  
71 assess the feasibility of using Sentinel-1 satellite radar data to determine the extent of reservoirs' impact on the ice cover of  
72 this type of river. The ~~essential~~ hypothesis tested here is that dam reservoirs, at local and regional scales, have a greater  
73 impact on transformations in the occurrence of river ice cover than climate change.

74

## 75 2 Study area, data, and methods

### 76 2.1 Study area

77 The study was based on two sets of dam reservoirs located in the Outer Western Carpathians (Solina-Myczkowce) and the  
78 Central Western Carpathians (Dunajec- Sromowce Wyżne) in central Europe (Fig. 1). These reservoirs are located on two  
79 second-order mountain rivers whose sources are in the higher reaches of the Carpathians: the Dunajec and the San rivers.  
80 The flow of the Dunajec at its mouth **averages** over  $84 \text{ m}^3\text{s}^{-1}$  with a catchment area of  $6735 \text{ km}^2$ , while that of the San  
81 **averages**  $134 \text{ m}^3\text{s}^{-1}$  with a catchment area of  $16,824 \text{ km}^2$  (Punzet, 1991). The width of the rivers in the sections below the  
82 dams varies from 30 m to more than 100 m. The basic characteristics of both sets of reservoirs are shown in Table 1.

83

84 **Table 1:** Characteristics of the studied reservoirs.

| Reservoir      | River   | Year of completion | Total capacity [million $\text{m}^3$ ] | Type of dam  | Damming height [m] | Average inflow during the winter [ $\text{m}^3\text{s}^{-1}$ ] | Average outflow during the winter [ $\text{m}^3\text{s}^{-1}$ ] |
|----------------|---------|--------------------|----------------------------------------|--------------|--------------------|----------------------------------------------------------------|-----------------------------------------------------------------|
| Czorsztyn      | Dunajec | 1997               | 231,9                                  | ground dam   | 52                 | 20,6                                                           | 20,4                                                            |
| Sromowce Wyżne | Dunajec | 1994               | 7,42                                   | ground dam   | 10                 |                                                                |                                                                 |
| Solina         | San     | 1968               | 473,0                                  | concrete dam | 58                 | 24,1                                                           | 24,6                                                            |
| Myczkowce      | San     | 1961               | 10,0                                   | ground dam   | 15                 |                                                                |                                                                 |

85 Source of data: Hennig et al. 1991; Bajorek et al. 2003

86 The two reservoir complexes studied ~~in~~ here consist of a main reservoir and an equalization reservoir. The Czorsztyn and  
87 Solina reservoirs are intended mainly for electricity production, and play a role in flood control, while the Sromowce and  
88 Myczkowce reservoirs serve as equalizing reservoirs for daily flow fluctuations caused by the operation of hydroelectric  
89 power plants. Both reservoirs significantly affect the thermal regime of the rivers below their locations. It has previously  
90 been shown that the operation of the hydroelectric power plant at the Solina reservoir significantly transforms the thermal  
91 regime of the Myczkowce reservoir, and consequently of the river below it, warming it in winter by about  $2 \text{ }^\circ\text{C}$  (Lewinska  
92 and Lewinski, 1972). In the case of the Czorsztyn-Sromowce reservoir complex, studies have shown that they warm the



93 temperature of the Dunajec waters below the reservoir by 1-2°C (Wiejaczka et al. 2015, Kędra and Wiejaczka, 2017). In  
94 addition, a disturbance between the air and water temperatures of the river below the reservoirs caused by their operation has  
95 also been found (Kędra and Wiejaczka, 2016). Both sets of reservoirs also experience a transformation of river flow volume  
96 due to the operation of hydropower plants and equalization reservoirs, with respect to natural conditions.

97 The main reasons for selecting these sites for this study were the good availability of hydrological and meteorological  
98 data, as well as the location and characteristics of these reservoirs. These reservoirs represent facilities typical of  
99 mountainous areas in terms of the size of the dam and the flow of the rivers on which they are located. This allows the  
100 results obtained to be related to other similar facilities and rivers. Additionally, the literature lacks a sufficient number of  
101 studies regarding ice phenomena in relatively small mountain rivers (Thellman et al. 2021).

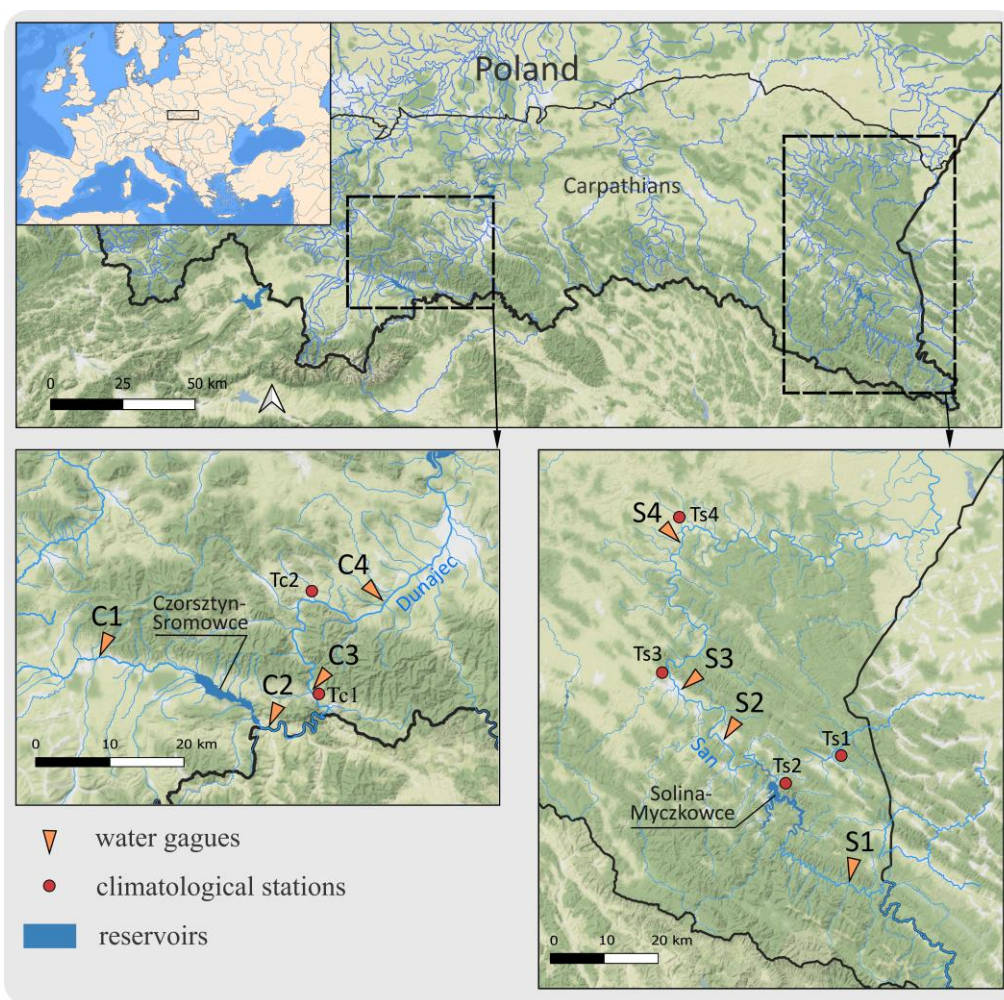

102

103 **Figure 1:** Study area and location of measurement stations used in the study.

104 Source: Map tiles by Stamen Design, under CC BY 4.0. Data by OpenStreetMap, under ODbL

105





## 2.2 Data and methods

In order to estimate the impact of dam reservoirs on river ice cover, data on the daily occurrence of ice cover over the period 1950–2020 were obtained at eight water gauge cross sections (four for each reservoir complex studied) (Figure 1). The occurrence of ice cover at a water gauge cross-section was defined as any occurrence of total ice cover (water surface completely covered by ice) or border ice (partial coverage of the water surface by ice). In both cases, one cross-section was located above the reservoir (C1, S1), while the others were located below the reservoir location, at distances ranging from several to tens of kilometers from the reservoir (C2: 1.8 km, C3: 22 km, C4: 52 km, S2: 11.7 km, S3: 33 km, S4: 80.5 km). Data on the occurrence of ice phenomena each day of the winter periods (November to March) in the 1950–1980 period were obtained from hydrological yearbooks published by the Polish State Hydrological and Meteorological Institute. These yearbooks were issued only in printed form, so for this study they were digitized by manually transcribing data on daily ice cover occurrence. Data on the occurrence of ice cover in the 1981–2020 period were obtained from the online public database of the Institute of Meteorology and Water Management - National Research Institute (IMGW-PIB, <https://danepubliczne.imgw.pl/>). Data on the course of average daily air temperature at climatological stations were also obtained from the IMGW-PIB public database. For the Solina-Myczkowce reservoir complex, climatological data were obtained from four stations (Ts1, Ts2, Ts3, Ts4), while for the Czorsztyn-Sromowce reservoir complex they were obtained from two (Tc1, Tc2). The acquired data on the occurrence of ice cover were subjected to **statistical analysis** involving a comparison of the duration of ice cover before and after the formation of the reservoirs at stations above and below its location, as well as a comparison of the two studied rivers. Data from periods for which there were no observations, or in which observations were incomplete, were excluded from the statistical analysis.

In order to separate the effects of climate change and reservoir operations on the ice cover of the studied rivers, a logistic regression method was used to model the relationship between air temperature and ice cover occurrence. Logistic regression is a method that allows the classification of a dichotomous explanatory variable based on one or more explanatory variables. The method was first proposed by Cox (1957) and is widely used in classification and prediction in natural science research. Previously, it has been used in studies of river ice phenomena (Yang et al. 2020, Wu et al. 2021), the delineation of flood-prone areas (Lee and Kim, 2021) or of areas susceptible to landslides (Ayalew and Yamagishi, 2005), among other applications, but has not been used in natural studies of the effects of dam reservoirs. Logistic regression analysis is based on the concept of odds ratios (OR) that represent the ratio of the probability ( $p$ ) that an event will occur and the probability that the event will not occur, and which is expressed by equation (1).

$$OR = \frac{p}{1 - p} \quad (1)$$

In order to carry out a binary classification of the dependent variable on the basis of the continuous independent variable, a logit transformation was applied by logarithmizing the odds ratio, as expressed by equation (2):



138

$$\text{Logit}(OR) = \log\left(\frac{p}{1-p}\right) = \beta_0 + \beta_1 x_1 \quad (2)$$

139

140

141

142

where  $x_1$  is the explanatory variable and  $\beta_0$  and  $\beta_1$  are regression coefficients that are estimated using the maximum likelihood method. The probability of ice cover occurrence on a given day ( $p$ ) is calculated using equation (3) and classification is done by applying a threshold value of probability that separates the occurrence of ice cover from its absence:

143

$$p = \frac{1}{1 + e^{-(\beta_0 + \beta_1 x_1)}} \quad (3)$$

144

145

146

where  $x_1$  is the average air temperature of the 14 days prior to each day. The average air temperature of the 14 days prior to each modelled day was selected based on preliminary tests involving predicting the occurrence of ice cover based on the average of a different number of days prior to the modelled day.

147

148

149

150

151

152

153

154

155

156

157

158

159

160

161

162

163

164

165

166

167

168

The first stage of analysis required coding of the data from the water gauge stations, with a value of 1 assigned to each day in which ice cover occurred and a value of 0 assigned if it did not for the period from November to March over the entire study period (sometimes the period was shorter than 70 years due to data gaps). Each record was assigned an average air temperature from 14 days before the modeled day determined from measurements from the nearest climatological station. In some cases, data from several **nearby stations** were used simultaneously due to gaps in measurement data. Based on the acquired database, a logistic regression model of the relationship between the course of the average air temperature from 14 days before the modeled day and the occurrence of ice cover in the period before the dam reservoirs were built for each water gauge station. For the water gauges on the Dunajec River (C1, C2, C3, C4), data from the period 01.11.1957-31.03.1990 were used as the set for learning the model, while for the San River, data from the period 01.11.1956-31.03.1967 (S1) or 14.01.1951-31.03.1967 (S2, S3, S4) were used, depending on the station. The data for building the model was divided into a training set and a test set in the ratio of 70% to 30%. Model learning and hyperparameter optimizations (C - Inverse of regularization strength) were carried out based on the training set. Stratified cross-validation was used to avoid over-fitting the model on the training set, and the quality of the resulting models was determined by the prediction accuracy and the value of the area under the ROC curve (receiver operating characteristic curve) on the test set (ROC-AUC value). Based on the obtained models, for each adopted winter period, the probability of ice cover occurrence at the tested cross sections was calculated based on the average air temperature, from which it was determined whether ice cover could occur on a given day. Then, the ice cover occurrence data calculated from the model based on the course of the average air temperature was compared with actual observations of ice cover at all stations. In this study, it was assumed that the difference between the number of days with ice cover predicted by the model and the number of days with ice observed at the stations was due to the operation of dam reservoirs. In order to validate these results, the results of modeling and observations from stations above and below the reservoir were compared. All calculations were carried out using Python and the Scikit-learn library.



169 The period of January to February 2017 was chosen to determine the spatial extent of the impact of dam reservoirs on  
170 river ice cover based on remote sensing data. This choice was due to the persistence of very low air temperatures at  
171 measuring stations in the study areas during this period. Many stations recorded the lowest average January temperature  
172 since 2006 ( $-7.3^{\circ}\text{C}$ ) at this point, and occasionally, the air temperature reached as low as  $-20^{\circ}\text{C}$ . It was found that such air  
173 temperature resulted in the persistence of ice cover on the studied rivers before the construction of dam reservoirs. Moreover,  
174 during this period, ice cover was observed at the water gauge cross sections above the two reservoirs from the beginning of  
175 December to the end of February. **This study assumed that the lack of ice cover below dam reservoirs on the studied rivers**  
176 **during this period was due to dam operation.**

177 In order to characterize the influence of the studied reservoirs on the occurrence of ice cover, the extent of river sections  
178 below the reservoirs where ice cover did not form on selected days was determined. The occurrence of ice cover was  
179 determined on the basis of radar (SAR) images acquired by Sentinel-1 satellites. In the first stage, the area of rivers (water  
180 surface) below the studied reservoirs was determined by manually creating polygons on the basis of aerial photos and  
181 cloudless Sentinel-2 satellite images. River areas in the vicinity of hydraulic structures (bridges), narrow river sections ( $< 30$   
182 m in width) and areas close to the banks (about 10 meters from the shore) were excluded from the analysis, which made it  
183 possible to exclude pixels partially covering areas other than the water surface. Then, for the designated polygons, Sentinel-1  
184 SAR IW GRD imagery was acquired from five different days, for both studied rivers (02.01, 09.01, 14.01, 26.01, and  
185 14.02.2017 for the Dunajec River and the Czorsztyn-Sromowce reservoir complex, and 09.01, 16.01, 21.01, 28.01 and  
186 14.02.2017 for the San River and the Solina-Myczkowce reservoir complex). Data from descending orbits in VV and VH  
187 polarization were used. This study used imagery provided by Google Earth Engine, in which orbit metadata were updated,  
188 border noise was removed, thermal noise was removed, radiometric calibration values were applied, and terrain correction  
189 was performed. After preprocessing, the data had a spatial resolution of 10 meters. In order to classify the acquired images  
190 (water/ice), thresholds of the backscattering coefficient that separated the occurrence of ice cover from water were  
191 determined for both studied rivers. This determination of the presence of ice cover was made possible by the marked contrast  
192 between the two classes (ice/water) due to the significant effect of ice cover presence on the backscattering coefficient of the  
193 microwave radiation beam (Stonevicius et al., 2022; Palomaki and Sproles, 2022). Consolidated ice tends to have  
194 significantly higher backscattering values than water, mainly due to the roughness of its surface. For this purpose, the value  
195 of the backscattering coefficient was used for designated sections of rivers completely covered by ice (January 14 for the  
196 Dunajec River and January 9 for the San River). These sections were determined on the basis of cloudless images from the  
197 Sentinel-2 satellite. The thresholds of the values separating the two classes were calculated separately for the two studied  
198 rivers according to equation (4):

199  
200 
$$\tau_{\sigma} = \sigma - s \tag{4}$$
  
201

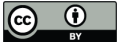

202 where  $\sigma$  is the average backscatter from selected sections of ice-covered rivers, and  $s$  is the average standard deviation of  $\sigma$   
 203 (Sobiech and Dierking 2013). For the Dunajec River, the thresholds were set at  $-19.24$  dB for VH polarization and  $-10.16$   
 204 dB for VV polarization, while for the San River they were set at  $-21.16$  for VH polarization and  $-11.55$  for VV polarization.  
 205 The results were validated by comparing the classification results of Sentinel-1 radar imagery with optical imagery acquired  
 206 by Sentinel-2 satellite for the Dunajec area acquired on February 14, 2017.

207 **1. Results**

208 For both studied rivers, the highest average annual number of days with ice cover during the study period occurred at cross  
 209 sections located above the dam reservoirs: 65 days at point C1 (Dunajec) and 75 days at point S1 (San, Fig. 2).

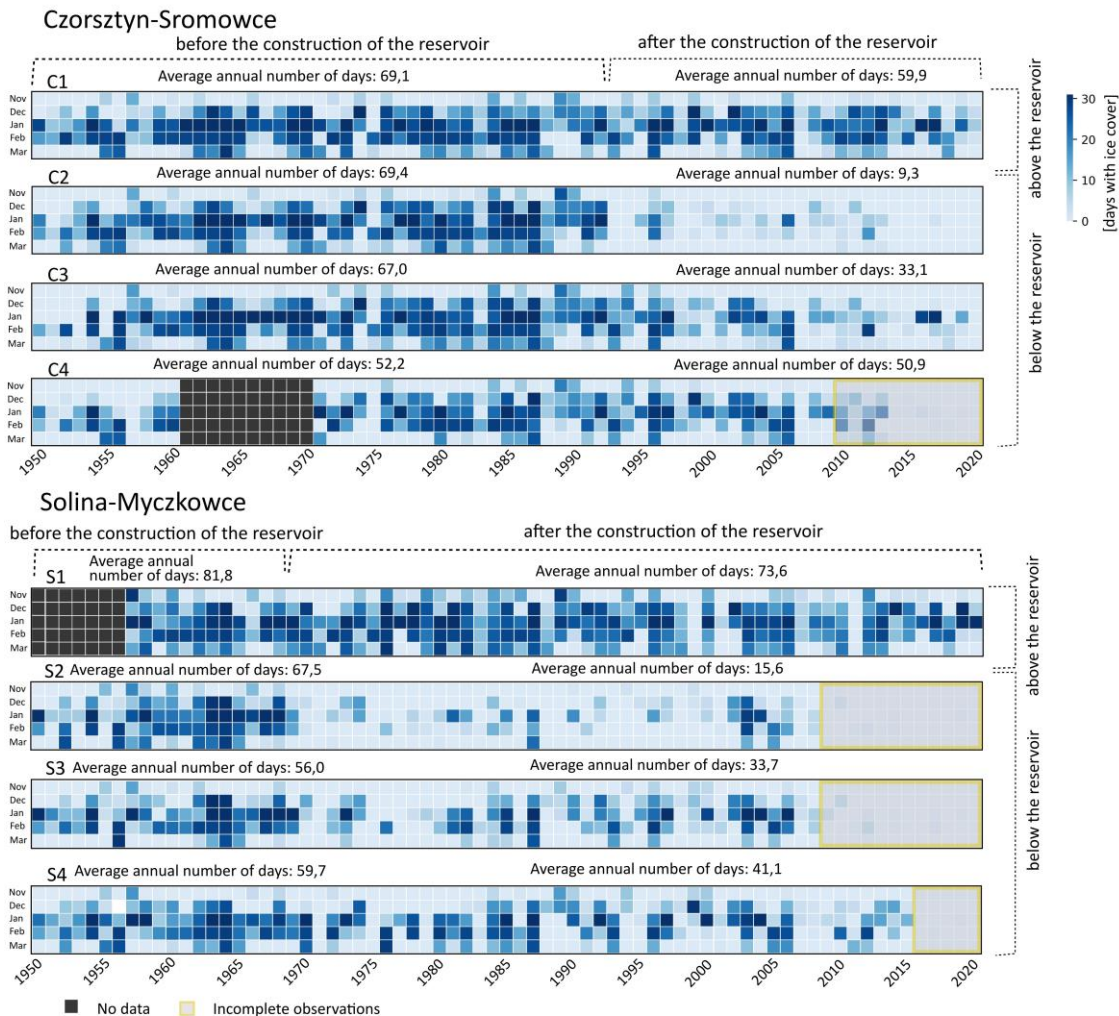

210

211 **Figure 2:** Observed number of days with ice cover in each month at water gauge stations.



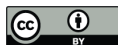

212 At cross-sections below the reservoirs, the average annual number of days with ice cover ranged from 45–53 days for the  
213 Czorsztyn-Sromowce reservoir complex (C2, C3, C4) and from 32–46 days for the Solina-Myczkowce reservoir complex  
214 (S2, S3, S4). In all studied cross sections, a decrease in the frequency of ice cover was observed after the reservoirs were put  
215 into operation (Fig. 2).

216 In the case of the Dunajec River, the decrease in frequency varied along the river's longitudinal profile. At the cross-  
217 section located above the reservoir (C1), a 13.3% decrease in the number of days with ice cover was observed in the post-  
218 reservoir period (1993–2020) compared to the earlier period (1950–1992). At cross-sections located below the reservoir, the  
219 greatest decrease in the frequency of ice cover occurred at point C2 (86.2%) and decreased with increasing distance from the  
220 reservoir at cross-sections C3 and C4 (50.6% and 2.7%, respectively). For the San River, at the cross-section located above  
221 the reservoir (S1), a 10% decrease in the number of days with ice cover was observed in the period after its construction  
222 (1969–2020) compared to the earlier period (1950–1968). At cross sections below the reservoir (S2, S3, S4), the decrease in  
223 frequency was 77% , 39.8% and 31.2%, respectively. In the period before the construction of the reservoirs on the two rivers  
224 under study, the annual ice pattern followed a similar trend, despite the fact that they are approximately 140 kilometers apart.  
225 For example, the Pearson correlation coefficient of the annual number of days in the 1950–1968 period between stations C2  
226 and S2 was 0.76 and was 0.86 between stations C3 and S3. In the period after the construction of the Solina-Myczkowce  
227 reservoir complex (1969–2009), the correlation dropped to 0.04 and 0.47, respectively.

228 The predictive ability of the logistic regression models was relatively high. The accuracy of correctly classifying days in  
229 the test set into two groups (days with ice cover/days without ice cover) based on the average air temperature of the 14 days  
230 before the modeled day ranged from 80–87%. The developed models had very good predictive ability, as evidenced by the  
231 high values of the area under the ROC curve ranging from 0.89–0.94 (Fig. 3).

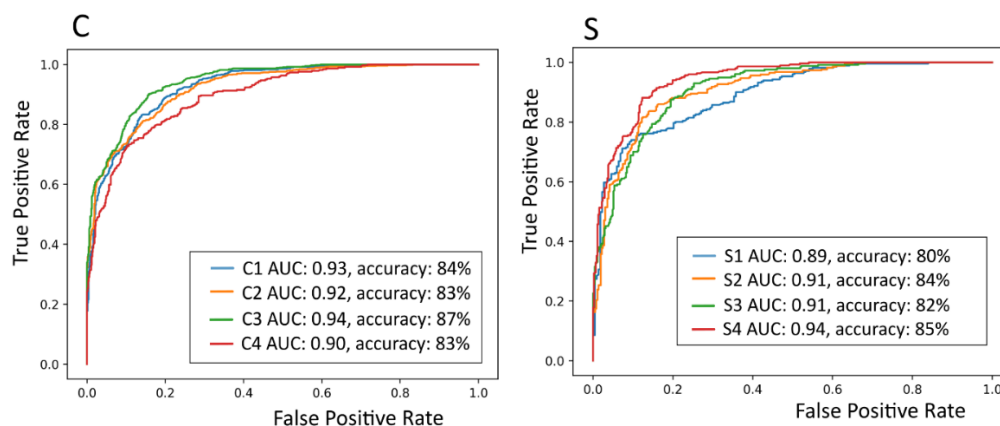

232  
233 **Figure 3:** ROC curve, **AUC** values and prediction accuracy.

234  
235 In the case of the Dunajec River, there is a noticeable difference in the values observed and predicted by the model below  
236 and above the Czorsztyn-Sromowce Wyzne reservoir complex (Fig. 4). At the C1 water gauge cross-section, the number of

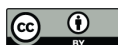

237 days with ice cover observed and predicted from air temperature before and after the reservoir was very similar (Fig. 4). At  
238 this location in the 1957–1992 period, the annual average observed number of days with ice cover was 73.1 days, while the  
239 number predicted by the model was 72.3 days.

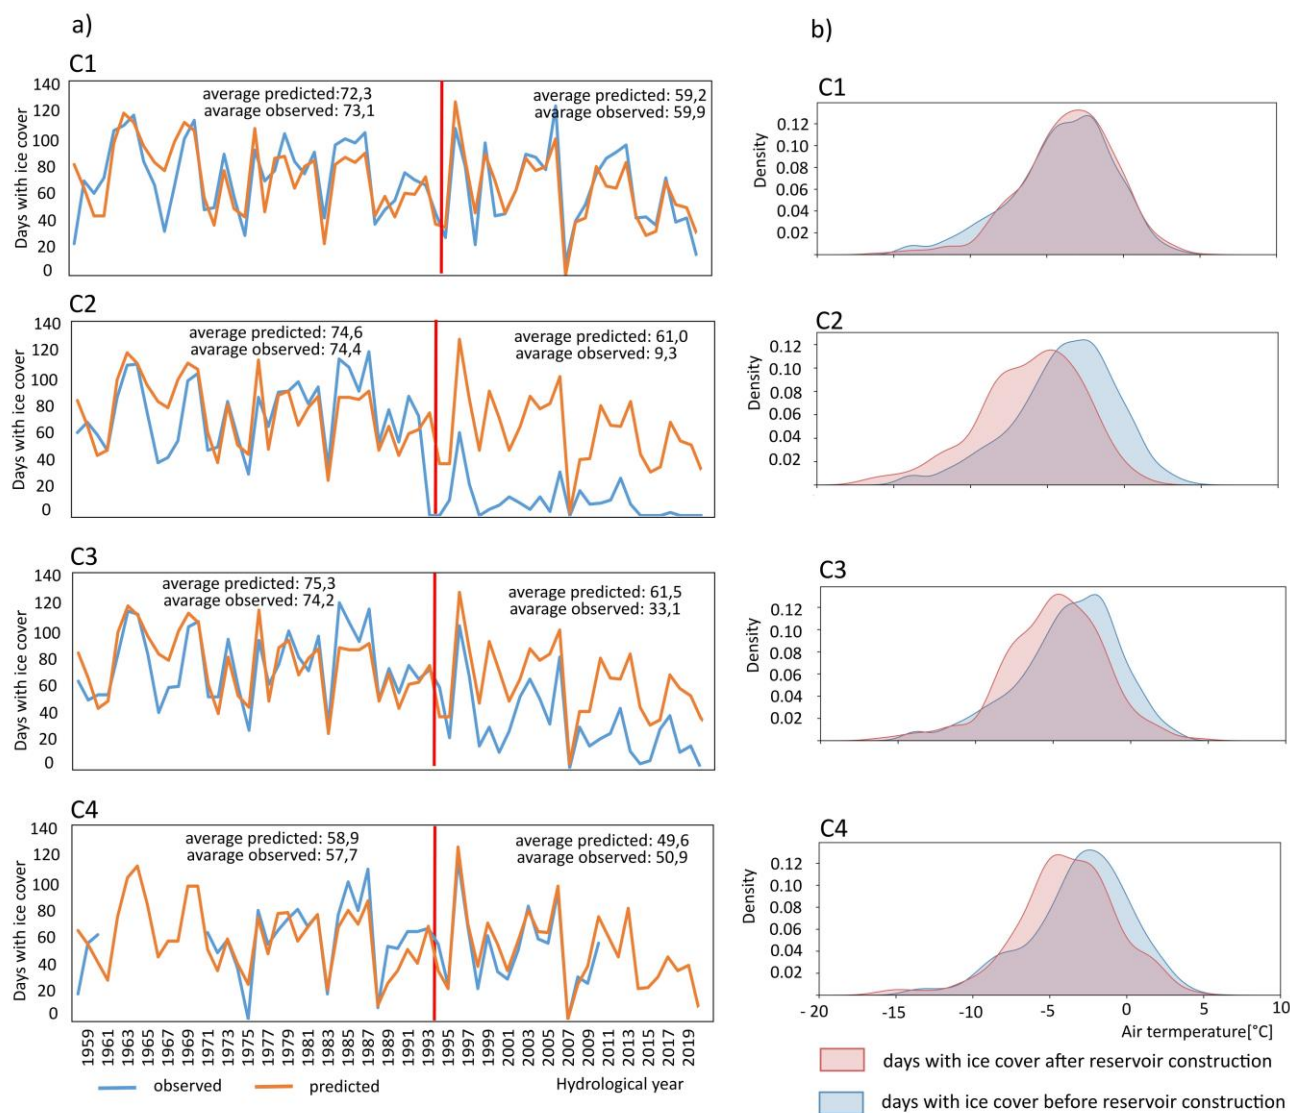

240  
241 **Figure 4:** Comparison of modeling results based on air temperature with observations of ice cover for the Dunajec River and  
242 the Czorsztyń-Sromowce reservoir complex (a) and the density of the distribution of days with ice cover at temperatures  
243 before and after the construction of the dam reservoir (b). The red line indicates the year the dam was built.  
244



245 In the post-reservoir period (1993–2020), these values were 59.9 and 59.2 days, respectively. At point C2, located  
 246 directly below the reservoir, there was a significant discrepancy between the observed and predicted values based on air  
 247 temperature in the post-reservoir period. In the 1957–1992 period, the average annual totals observed and predicted by the  
 248 model were very similar: 74.4 and 74.6, respectively. In the period after the construction of the reservoir (1993–2020), the  
 249 observed average annual number of days with ice cover was 9.3, while the number of days predicted by the model was 61.

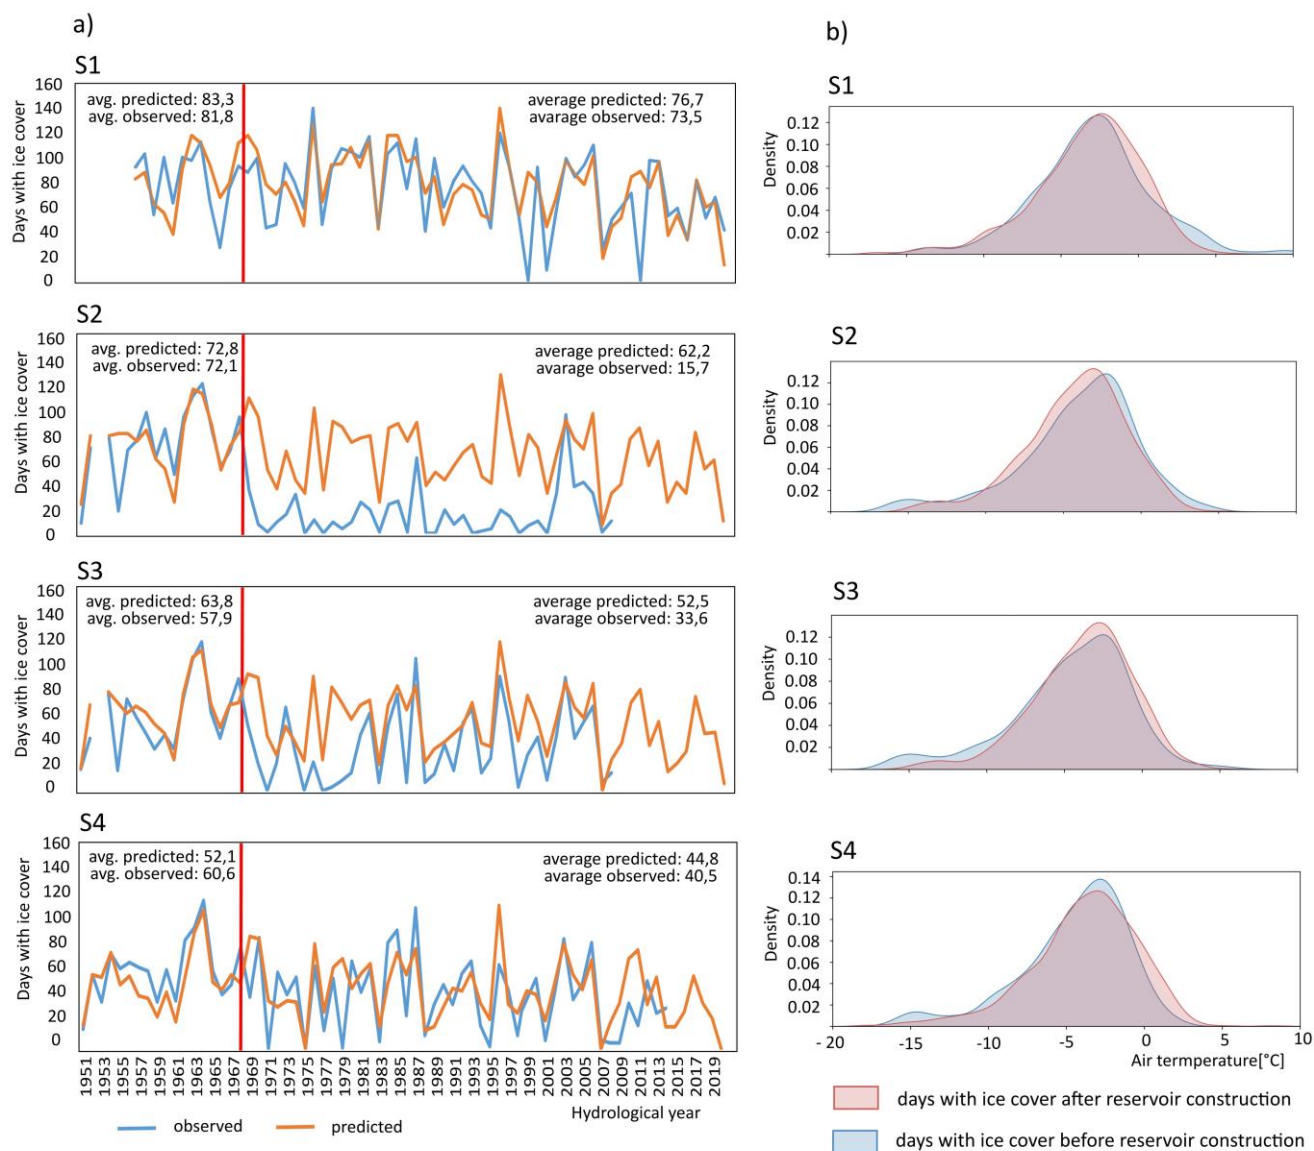

250  
 251 **Figure 5:** Comparison of modeling results based on air temperature with observations of ice cover for the San River and the  
 252 Solina-Myczkowce reservoir complex (a) and the density of the distribution of days with ice cover at temperatures before and  
 253 after the construction of the dam reservoir (b). The red line indicates the year the dam was built.



254

255

256 At point C3, after the construction of the reservoir, the difference between the observed and predicted average number of  
257 days with ice cover was less than at point C2, but still notable (half as much). At point C4 in the period after the construction  
258 of the reservoir, values were more similar to each other; the observed number of days was 50.1 while the predicted number  
259 of days was 47.5. In the cross sections located below the reservoir (C2, C3, C4), there was a significant shift in the  
260 distribution of the number of days with ice cover in the average air temperature in the period after the construction of the  
261 reservoir compared to the earlier period. This effect was not observed at point C1.

262 Similar results were obtained regarding the Solina-Myczkowce reservoir system (Fig. 5). In the cross-section located  
263 above the reservoir (S1), the temperature-based prediction and the observed average number of days with ice cover were  
264 similar both before (1950–1968) and after (1969–2020) the reservoir was built. For cross-section S2, located directly below  
265 the reservoir, a significant discrepancy was found in the observed and model-predicted average number of days with ice  
266 cover after the reservoir's construction. The average observed number of days with ice cover before the reservoir's  
267 construction was 72.1, while the number predicted by the model was 72.8. After the reservoir's construction, the observed  
268 average number of days dropped to 15.7 while the predicted number of days was 62.2. A similar trend was observed for  
269 cross-section C3. The annual average observed number of days with ice cover in the period after the reservoir's formation  
270 was 33.6, while that predicted by the model based on temperature was 52.5. At water gauge cross-section S4, the model-  
271 predicted and observed number of days with ice cover were very similar both before (predicted = 52.1; observed = 60.6) and  
272 after the reservoir was built (predicted = 44.8; observed = 40.5). In the case of the San River, a slight shift in the distribution  
273 of the number of days with ice cover in the mean air temperature was observed only at cross-section S2 located directly  
274 below the Solina reservoir.

275 It is worth noting that the accuracy of the prediction of ice cover occurrence by the developed models. Although the  
276 prediction accuracy determined from the test set varied in the 80–87% range, the multi-year averages of observed and  
277 predicted values at stations above the reservoirs were very close to each other (59.2/59.9 in cross-section C1 and 76.7/73.5 in  
278 cross-section S1 in the period after the construction of the reservoirs). The high agreement of these data suggests a higher  
279 accuracy than was determined from the test sets. This is most likely due to the dichotomous nature of the errors made by the  
280 model. The overall error includes predictions of the occurrence of ice cover when in reality there was none, and predictions  
281 of the absence of ice cover when in fact there was. Most likely, the existence of both types of errors in similar proportions  
282 resulted in high agreement over the long term (> 40 years).

283 The results of analysis of Sentinel-1 (SAR) data showed that, during the study period (January-February 2017), total ice  
284 cover did not form in a section of about 60 kilometers below the Czorsztyn-Sromowce reservoir complex and 26 kilometers  
285 below the Solina-Myczkowce reservoir complex (Fig. 6).

286

287





288

289

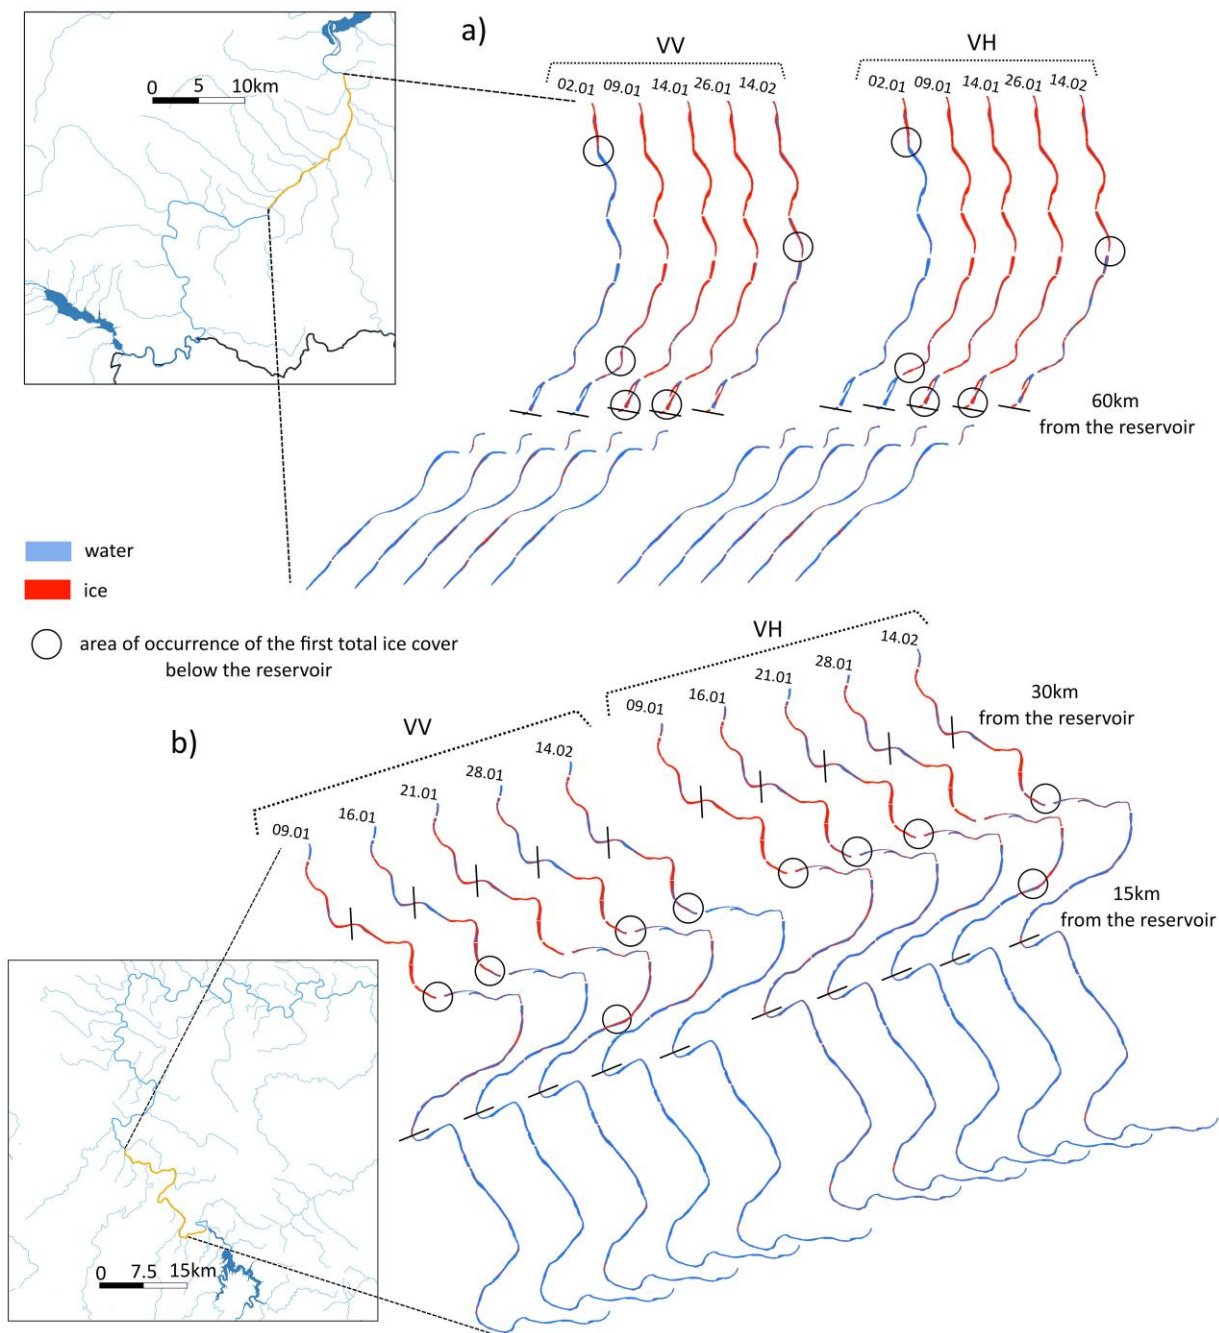

290

291 **Figure 6:** The extent of ice cover on the Dunajec (a) and San rivers (b).

292



293 The greatest icing events occurred in the second half of February, which was associated with the persistence of very low air  
294 temperatures (close to  $-10^{\circ}\text{C}$ ). On both studied rivers, three sections could be distinguished in terms of ice phenomena.  
295 Directly below the reservoir, a section was observed where the ice cover did not form completely. In the case of the  
296 Czorsztyn-Sromowce reservoir complex it reached about 40–50 kilometers below the reservoir, while in the case of the  
297 Solina-Myczkowce reservoir complex, it extended about 10 kilometers below the reservoir. Further away was a section  
298 where border ice occasionally formed, but the ice cover did not form completely, and the amount of border ice increased as  
299 the distance from the reservoir increased. The third section was characterized by the occurrence of total ice cover on most  
300 sections of the studied rivers ( $>60$  kilometers in the case of the Czorsztyn-Sromowce reservoir complex and  $>26$  kilometers  
301 below the Solina-Myczkowce reservoir complex).

302 Visual analysis of the classification results of SAR imagery, backscatter coefficient distribution maps, and optical  
303 imagery showed that the determination of the area where ice cover was not present below the reservoir was relatively  
304 accurate. River sections without ice cover were characterized by a predominance of pixels classified as water, while sections  
305 with ice cover were characterized by a predominance of pixels classified as ice (Fig. 7). The largest classification errors were  
306 recorded in narrow and shallow sections of the surveyed rivers without ice cover, where there was an increase in the  
307 backscatter coefficient unrelated to the presence of ice cover. This resulted in misclassification of pixels from this area as ice.  
308 Misclassification of pixels was also recorded in transition sections between open water and total ice cover where border ice  
309 was present, especially in narrow river sections.

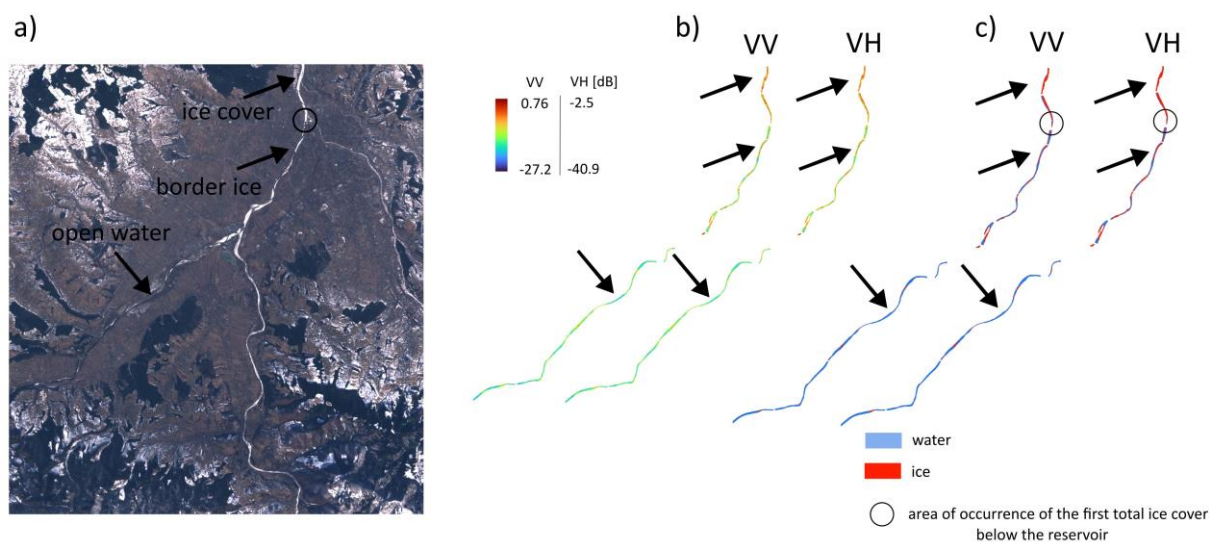

310  
311 **Figure 7:** Comparison of Sentinel-1 backscatter coefficient (b), classification results (c) and Sentinel-2 data (a) acquired on  
312 February 14, 2017 for the Dunajec River.

313 Source: own elaboration based on data obtained from Copernicus Sentinel Data (<https://scihub.copernicus.eu/>). Copernicus  
314 Sentinel data (2017), processed by ESA.

315



#### 316 4. Discussion

317 This study demonstrates that the operation of the analyzed dam reservoirs was an important element in transforming the ice  
318 regime of the rivers below their locations. On the basis of observational data and modeling results, we found that the greatest  
319 transformations occurred at cross sections located closest to the facilities (C2, S2), and their influence decreased with  
320 increasing distance from the reservoir. This effect may be interpreted as a gradual decrease in the **influence of the reservoir**  
321 and restoration of the natural course of thermal and ice processes in rivers. The use of a classification method based on  
322 logistic regression allowed us to estimate that, in the case of the Czorsztyn-Sromowce reservoir complex, at cross-section C2  
323 (1.8 km below the dam) in the period 1992–2020, the operation of the reservoir reduced the duration of ice cover by 84% on  
324 average, while at point C3 (22 km below the dam), reservoir operation reduced ice cover by 46%. Similarly, in the case of  
325 the Solina-Myczkowce reservoir complex, the operation of the reservoir reduced the duration of ice cover by about 75% at  
326 point S2 (11.7 kilometers below the dam), and by 36% at point S3 (33 kilometers below the dam). These results suggest that  
327 in the stretch of rivers about 20–40 kilometers below the reservoirs, the influence of the reservoirs was the main factor (it  
328 transformed the ice regime more than climatic variability) determining the observed disappearance of ice cover and the  
329 course of ice processes. This is supported by the much smaller magnitude of the decrease in the frequency of ice cover at  
330 cross sections above the reservoirs (10% and 13.3% after the construction of the reservoirs compared to the earlier period),  
331 where the decrease was mainly due to climatic conditions.

332 A visual comparison of the classification results of radar imagery (Sentinel-1) with optical data (Sentinel-2) showed that  
333 it was possible to determine, with relative accuracy, the extent to which there was no ice cover below dam reservoirs on  
334 mountain rivers with similar characteristics to those analyzed in this study. Based on the threshold of the backscattering  
335 coefficient to two classes (water/ice) on rivers similar to those studied here (width of 20–100 meters), it was possible to  
336 determine the approximate extent of the river section below the reservoir on which the total ice cover did not form. The  
337 range of influence of the studied reservoirs on the occurrence of river ice cover on the basis of SAR data was determined to  
338 be 26 kilometers for the Solina-Myczkowce reservoir complex, and 60 for the Czorsztyn-Sromowce reservoir complex. An  
339 analysis of the river network in the catchments of the studied rivers showed that the smaller extent of the influence of the  
340 Solina-Myczkowce reservoir complex was most likely due to the mixing of the waters of the San with two relatively large  
341 tributaries in close proximity to the reservoir, the Hoczewka and Oslawa (average winter flow at the mouth of  $2.8 \text{ m}^3/\text{s}^{-1}$  and  
342  $8.6 \text{ m}^3/\text{s}^{-1}$ , respectively). The mixing of these waters with those of the San River (average winter outflow from the reservoir  
343  $24.6 \text{ m}^3/\text{s}^{-1}$ ) may lead to a drop in water temperature and the appearance of ice phenomena. This is also evidenced by the lack  
344 of a clear shift in the number of days with ice cover in the average air temperature at cross sections below the reservoir. By  
345 comparison, for the Dunajec River, total ice cover appeared during the analyzed period about 60 kilometers below the  
346 reservoir in the vicinity of a tributary of the Poprad River, one of the larger tributaries of the river.

347 Similar results have been previously obtained for other dam reservoirs located in mountainous areas, including in the  
348 Carpathian Mountains. Cyberska (1972, 1975) analyzed the influence of a complex of dam reservoirs (dam height of 32.5  
349 meters) on the thermals and occurrence of ice phenomena on the Dunajec River (Poland). Cyberska estimated that in the



350 period after the reservoir's construction, the 12–65 km downstream area of the reservoir saw an average 65% reduction in the  
351 duration of ice cover. These values are slightly higher than those obtained in this study, especially for cross sections located  
352 far from the reservoir, which may be due to the fact that they were estimated based on the comparison of periods before and  
353 after the reservoir's construction without accounting for the possible influence of changing climatic conditions. An estimate  
354 based on a similar methodology made by Wiejaczka (2009) showed that, on the Ropa River, at a cross-section located 16 km  
355 downstream of the dam, after the construction of the dam reservoir (dam height of 34 meters), there was a 35% decrease in  
356 the frequency of ice cover (total and border ice). Chang et al. (2016) compared periods with similar thermal conditions  
357 (before and after reservoir construction) and analyzed the impact of large (dams 178 and 147 meters high) dam reservoirs on  
358 ice phenomena on the Yellow River. They found that their operation reduced the duration of ice phenomena at downstream  
359 stations by 33, 22, and 8 days, which is less than the value estimated in this study. However, these results are particularly  
360 significant given that the gauging stations are located more than 800 kilometers below the reservoirs. An important role in  
361 the transformation of the ice regime was also demonstrated in the case of the Williston Reservoir in Canada on the Peace  
362 River (dam height 186 meters). As a result of that operation, total ice cover did not form for 100–300 kilometers downstream  
363 of the dam (Jasek and Pryse-Phillips 2015). This is far higher than the value estimated in this study, which may be due to the  
364 different sizes of these rivers and reservoirs. Similar results were obtained for the Krasnoyarsk reservoir (Belolipetsky and  
365 Genova 1998); downstream of the dam (124 meters), the ice cover also did not form for 100–300 kilometers, depending on  
366 hydrometeorological conditions. Transformations of the river ice regime have been observed for both large reservoirs (dams  
367 higher than 15 meters) and small ones. For example, Maheu (2016) analyzed the impact of small dam reservoirs (dams 7–13  
368 meters high) on thermals and water ice in eastern Canada. Using two examples, he showed that the operation of these  
369 facilities significantly raised water temperatures and reduced ice formation in sections up to 2.5 kilometers downstream.

370 Similar effects on river ice cover have also been reported for lowland reservoirs, which have different characteristics  
371 (usually less depth) due to terrain. Takács et al. (2013) analyzed the occurrence of ice cover above and below small dams (<  
372 10 meters) in the Raba River basin (Westen Transdanubia, Hungary). They based their study on selected periods with similar  
373 thermal conditions before and after the construction of the reservoirs, showing that, after their construction, the relative  
374 frequency of ice cover below their location decreased by up to 10%, and that anthropogenic factors were crucial in  
375 transforming the ice regime of rivers. The significantly smaller impact of these reservoirs than the values estimated in this  
376 study can be explained by their smaller size. Pawłowski (2015) showed that the construction of the Wloclawek reservoir on  
377 the Vistula River (Poland) resulted in a 47% reduction in the duration of ice cover downstream of its location and a 26%  
378 reduction in the duration of all ice events, leading to a significant transformation of the river's ice regime. Here, to  
379 demonstrate the impact of reservoirs, periods with similar average air temperatures before and after the reservoirs were  
380 selected. These values were smaller than those obtained in this work, which is likely due to the fact that the Wloclawek  
381 reservoir has a damming level that is five-fold lower (11 meters). Apsîte et al. (2016) analyzed the impact of the operation of  
382 three dam reservoirs (dam heights of 18–40 meters) on the phenology of ice phenomena on the Daugava River (Latvia),  
383 showing that, at a station 6 kilometers below the reservoir after its construction, there was a reduction in the duration of ice





384 cover by 91 days. This is a greater decrease in the frequency of ice cover than estimated in this study, but it was not  
385 determined how much of this effect was due to the construction of the reservoir in relation to climate change.

386 An important issue in analyzing the impact of dam reservoir operations on the ice regime of rivers lies in distinguishing  
387 their impact from that of air temperature variability, which is fundamental to the course of river ice processes and is the main  
388 determinant of the currently observed shortening of the duration of ice events on rivers (Magnuson et al., 2000; Yang et al.,  
389 2020; Newton and Mullan 2020). In the studies cited above, the impact of reservoirs was analyzed by comparing thermally  
390 similar periods before and after their formation. Typically, periods have been selected based on average winter temperatures.  
391 However, approach appears to be an oversimplification due to the averaging of extreme values over entire periods.  
392 Furthermore, this method limits analysis to selected periods only. **The method presented in this work made it possible to**  
393 **demonstrate the impact of reservoirs on river ice cover over the entire period after their creation, regardless of climatic**  
394 **variability.**

395 The results obtained here and in other studies indicate that dam reservoirs crucially transform the ice regime of river  
396 areas downstream of their locations. This effect occurs for both large and deep reservoirs and relatively shallow and small  
397 reservoirs. **The main reasons for the transformation of the ice regime of rivers by dam reservoirs may include the**  
398 **transformation of river thermals, changes in volume and flow dynamics due to their operation, and reduction in the supply of**  
399 **mobile ice from higher parts of the catchment.** A certain role may also be played by a dam's capture of some suspended  
400 material, the presence of which, in the water, contributes to the occurrence of phase transformation of water and the  
401 formation of a slick (Takács and Kern; 2015). Of particular importance in the case of the studied rivers may be the  
402 transformation of their thermals; Kędra and Wiejaczka (2016, 2017) and Wiejaczka et al. (2015) previously showed that the  
403 Czorsztyn-Sromowce reservoir system had a significant impact on the course of the Dunajec River water temperature (Fig.  
404 8), as well as the synchronization of air and water temperatures in the river.

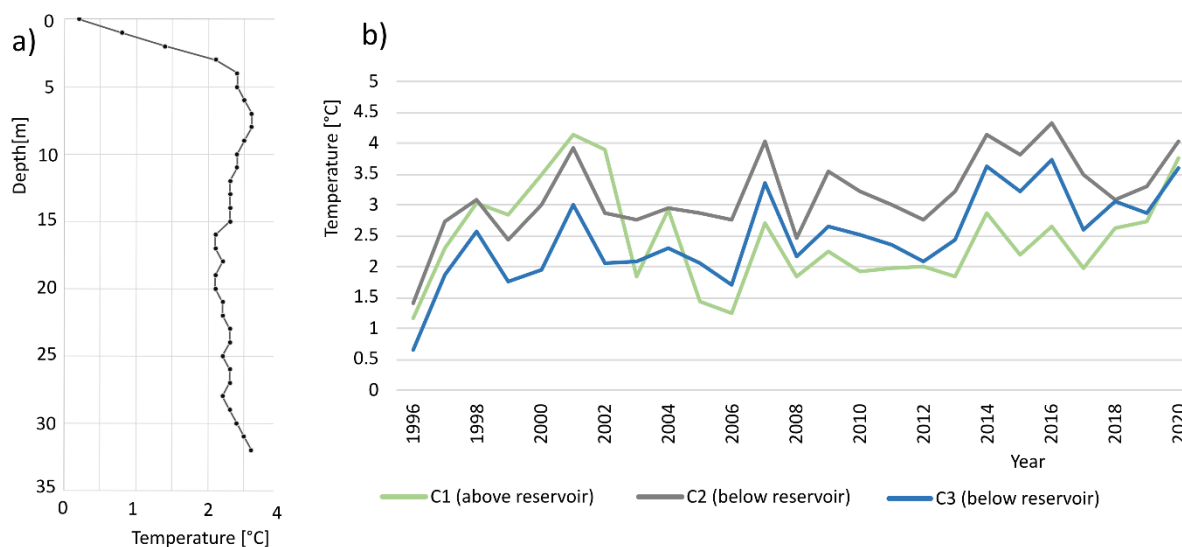

405



406 **Figure 8:** Vertical profile of water temperature in Czorsztyn Reservoir (a) and average water temperature of the winter  
407 periods in river at stations above and below the reservoir (b). Vertical profile temperature measurements were developed  
408 based on the work of Wiejaczka et al. (2015). The measurements were conducted on February 15, 2013. The average water  
409 temperature of the river was obtained from the database of the Polish Institute of Meteorology and Water Management.

410  
411 During winter, dam reservoirs warm the river below by releasing warmer bottom hypolimnion waters (Soja and Wiejaczka,  
412 2014). As a result, during cold winters, the water in the river below the reservoir reaches as much as 2 °C, limiting the  
413 possibility of ice cover development.

414 Despite the relatively high predictive ability of the presented logistic regression models and the high agreement between  
415 modeling results and observations at stations above the reservoirs, extreme caution should be exercised when analyzing the  
416 impact of dam reservoirs using the presented method because of limitations that arise from both the nature of the data and  
417 the river ice processes themselves. First of all, the presented method does not take into account other possible factors  
418 affecting river ice phenomena; these mainly may include regulation of rivers affecting the conditions of ice formation, all  
419 kinds of thermal pollutants emitted into rivers, discharges of municipal and industrial wastewater that can increase the  
420 content of dissolved substances and thus lower the freezing point, and the occurrence of natural changes in the hydrological  
421 and morphological characteristics of rivers and their channels. An important problem is also the significant sensitivity of the  
422 model to input data on the occurrence of river ice cover; due to its characteristics (large variation of parameters in the  
423 longitudinal profile of rivers, non-linear nature of development and disappearance, significant sensitivity to hydrological and  
424 meteorological conditions), this is difficult to describe and classify into a rigid framework, which can translate into modeling  
425 results.

426 The method presented in this paper and the results obtained here may be of significant importance in the study of the ice  
427 regime of rivers at local, regional, and global scales. This is due to the significant increase in the number of dam reservoirs in  
428 ice cover areas since the beginning of the second half of the 20th century (Fukś; 2023). It has been estimated that there are  
429 more than 8,000 such facilities, most of which are located in areas where ice cover on average lasts a relatively short time,  
430 from 15 days to 3 months (Fukś, 2023). In Europe, most of the reservoirs in areas where river ice is present are located in the  
431 central region and on the Fennoscandian peninsula (Fig. 9). In areas of ice cover, a particularly large number of reservoirs  
432 are also located in central North America and central and eastern Asia (Fukś; 2023). Moreover, these are areas where a  
433 significant reduction in the duration of river ice cover has been observed over the past 40 years (Yang et al., 2020). Based on  
434 the studies presented here, it is reasonable to assume that the increase in the number of dam reservoirs is responsible for part  
435 of this effect.

436

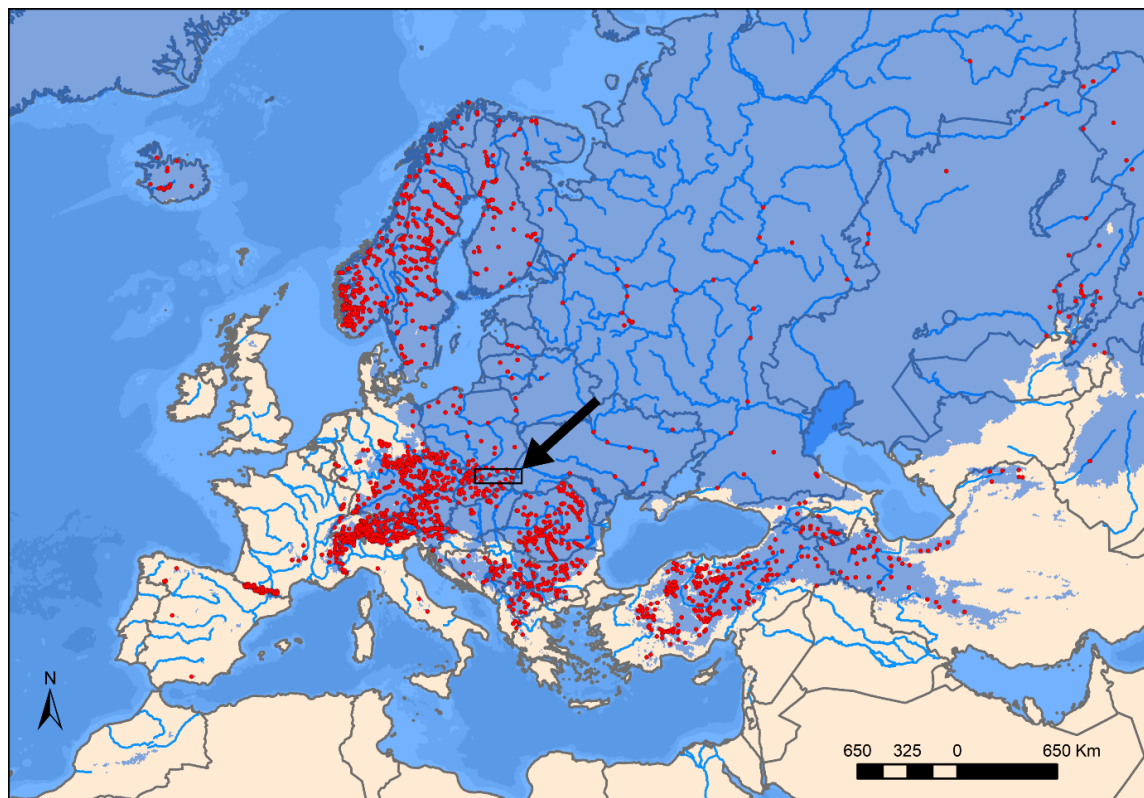

437

438

439

440

441

442

443

444

445

446

447

448

449

450

451

452

**Figure 9:** Location of dam reservoirs (red dots) in areas of river ice cover in Europe (highlighted in blue). The area of this research is marked with an arrow. Compiled from Fukš, 2023.

## 5. Conclusions

Using two reservoirs located in the Carpathian region as an example, this study presents a method for **estimating the impact of dam reservoirs** on river ice cover based on measurement data from water gauge cross sections and a logistic regression model. An estimation of the extent of the impact of dam reservoirs based on SAR data acquired by Sentinel-1 was also made here, and this method's use for determining the extent of dam impact was evaluated. The conclusions of the study can be summarized as follows:

1. **At the local scale (single river), dam reservoirs have a greater impact on the observed decrease in the occurrence of ice cover of the rivers studied than does climate change.** The results presented here suggest that, in areas with a large number of reservoirs, these reservoirs may play an important role at the regional scale. This is evidenced by the modeling results and their comparison to the variability of ice cover occurrence in cross-sections not influenced by a dam reservoir (C1, S1). The decrease in the incidence of ice cover due to the operation of dam reservoirs could exceed 80% in the sections of rivers immediately below dam locations, with this effect decreasing with increasing distance from the reservoir. Based on this



453 study, it can be assumed that the increase in the number of dam reservoirs is an important factor in the currently observed  
454 shortening of the duration of river ice cover.

455 2. The range of river sections below the studied reservoirs on which total ice cover does not form was estimated at 60  
456 and 26 kilometers from the reservoir dam location. Based on the results presented in this study and a review of the literature,  
457 it can be concluded that the extent of dams' impact varies greatly. This is most likely due to a number of environmental  
458 conditions in which the river and reservoir are located, as well as the technical features of the dam and reservoir.

459 3. Logistic regression models are a useful tool for studying the impact of dam reservoirs on river ice cover. This is  
460 evidenced by the high predictive ability of the created models, the relatively high accuracy determined on the basis of test  
461 sets, and the very high agreement of the modeling results with observations at cross sections above the reservoirs. After  
462 appropriate adaptation, the logistic regression model and the presented procedure can be used to study the impact of dam  
463 reservoirs on other elements of the natural environment.

464 4. In relatively narrow (20–100 meters) mountain rivers, SAR data is a useful tool for determining the sections below  
465 dam reservoirs in which ice cover does not form. Despite the many errors inherent in the classification of SAR imagery, it is  
466 possible to estimate how far below the reservoirs there is ice cover, which permits study of the extent of their influence. The  
467 usefulness of this type of data is evidenced by the validation of results based on optical imaging of the Sentinel-2 satellite.

#### 468 **Funding**

469 This research was funded in whole by the National Science Center, Poland (grant number: 2020/39/O/ST10/00652). For the  
470 purpose of Open Access, the author has applied a CC-BY public copyright license to any Author Accepted Manuscript  
471 (AAM) version arising from this submission.

#### 472 **Declaration of Competing Interest**

473 The author declares that he has no known competing financial interests or personal relationships that could influence the  
474 work presented in this article.

#### 475 **Data availability**

476 Data on the daily occurrence of ice cover on the studied rivers and daily air temperature were obtained from the repository of  
477 the Polish Institute of Meteorology and Water Management (IMGW-PIB, [https://danepubliczne.imgw.pl/data/dane\\_pomiarowo\\_obserwacyjne/](https://danepubliczne.imgw.pl/data/dane_pomiarowo_obserwacyjne/)) and hydrological yearbooks of surface waters of the  
478 Polish Institute of Meteorology and Water Management from 1949-1980. Sentinel-1 data was obtained from the Earth  
479 Engine Data Catalog ([https://developers.google.com/earth-engine/datasets/catalog/COPERNICUS\\_S1\\_GRD](https://developers.google.com/earth-engine/datasets/catalog/COPERNICUS_S1_GRD)).

#### 481 **References**

482 Apsīte, E., Elferts, D., and Latkovska, I.: Long-term changes of Daugava River ice phenology under the impact of the  
483 cascade of hydro power plants., in: Proc. Latv. Acad. Sci., 70, 71–77, <https://doi.org/10.1515/prolas-2016-0012>, 2016.  
484 Ayalew, L., and Yamagishi, H.: The application of GIS-based logistic regression for landslide susceptibility mapping in the  
485 Kakuda-Yahiko Mountains, Central Japan, *Geomorphology*, 65(1-2), 15-31,  
486 <https://doi.org/10.1016/j.geomorph.2004.06.010>, 2005.





- 487 Belolipetsky, V. M., Genova, S. N.: Investigation of hydrothermal and ice regimes in hydropower station bays. *Int. J.*  
488 *Comput. Fluid Dyn.*, 10(2), 151-158, <https://doi.org/10.1080/10618569808961681>, 1998.
- 489 Chang, J., Wang, X., Li, Y., and Wang, Y.: Ice regime variation impacted by reservoir operation in the Ning-Meng reach of  
490 the Yellow River, *Nat. Hazards*, 80, 1015–1030, <https://doi.org/10.1007/s11069-015-2010-5>, 2016.
- 491 Cox, D. R.: The regression analysis of binary sequences, *Journal of the Royal Statistical Society: Series B*  
492 (Methodological), 20(2), 215-232, 1958.
- 493 Cyberska B., Wpływ zbiornika retencyjnego na transformację naturalnego reżimu termicznego rzeki. *Prace IMGW*, 4, 45-  
494 108, 1975. [in Polish]
- 495 Cyberska B., Zmiany w temperaturze i zlodzeniu rzek poniżej zbiorników retencyjnych. *Gospodarka Wodna*, 7, 244-250,  
496 1972. [in Polish]
- 497 Fukś M.: Changes in river ice cover in the context of climate change and dam impacts – a review, *Aquat. Sci.*, 85(4),  
498 <https://doi.org/10.1007/s00027-023-01011-4>, 2023.
- 499 Fox-Kemper, B., Hewitt, H. T., Xiao, C., et al. (Eds.) *Climate Change 2021: The Physical Science Basis. Contribution of*  
500 *Working Group I to the Sixth Assessment Report of the Intergovernmental Panel on Climate Change. Cambridge*  
501 *University Press, Cambridge, United Kingdom and New York, NY, USA, 1211–1362, https://*  
502 *doi.org/10.1017/9781009157896.011, 2021.*
- 503 Hennig, J., Zbiorniki retencyjne, in: Dynowska I., Maciejewski M., (Eds.), 1991, *Dorzecze górnej Wisły Część 1*, PWN,  
504 1991. [in Polish]
- 505 Jasek, M., Pryse-Phillips, A.: Influence of the proposed Site C hydroelectric project on the ice regime of the Peace  
506 River. *Can. J. Civ. Eng.*, 42(9), 645-655, <https://doi.org/10.1139/cjce-2014-0425>, 2015.
- 507 Kędra, M., and Wiejaczka, Ł.: Climatic and dam-induced impacts on river water temperature: Assessment and management  
508 implications. *Sci. Total Environ.*, 626, 1474-1483, <https://doi.org/10.1016/j.scitotenv.2017.10.044>, 2017.
- 509 Kloss, A.: Zespół zbiorników wodnych Czorsztyń-Niedzica i Sromowce Wyżne im. Gabriela Narutowicza. *Monografia.*  
510 *Regionalny Zarząd Gospodarki Wodnej w Krakowie, Hydroprojekt Warszawa, Instytut Meteorologii i Gospodarki*  
511 *Wodnej, Kraków, 2003. [in Polish]*
- 512 Lee, J. Y., and Kim, J. S.: Detecting areas vulnerable to flooding using hydrological-topographic factors and logistic  
513 regression, *Appl. Sci.*, 11(12), 5652, <https://doi.org/10.3390/app11125652>, 2021.
- 514 Lewińska, J., Lewiński, A.: Wpływ energetycznego wykorzystania zbiorników wodnych na zmianę reżimu termicznego  
515 wody, *Gosp. Wodna*, 8, 295 – 296, 1972. [in Polish]
- 516 Lewis, S. L., and Maslin, M. A.: Defining the Anthropocene, *Nature*, 519, 171-180, <https://doi.org/10.1038/nature14258>,  
517 2015.
- 518 Magnuson, J. J., Robertson, D. M., Benson, B. J., Wynne, R. H., Livingstone, D. M., Arai, T., Assel, R.A., Barry, R. G.,  
519 Card, V., Kuusisto, E., Granin, N. G., Prowse, T. D., Stewart, K. M., and Vuglinski, V.S.: Historical trends in lake and



- 520 river ice cover in the Northern Hemisphere, *Science*, 289: 1743–1746, <https://doi.org/10.1126/science.289.5485.1743>,  
521 2000.
- 522 Maheu, A., St-Hilaire, A., Caissie, D., and El-Jab, N.: Understanding the thermal regime of rivers influenced by small and  
523 medium size dams in Eastern Canada, *River Res. Appl.*, 32, 2032–2044. <https://doi.org/10.1002/rra.3046>, 2016.
- 524 Newton, A. M. W. and Mullan, D. J.: Climate change and Northern Hemisphere lake and river ice phenology from 1931–  
525 2005, *Cryosphere*, 15, 2211–2234, <https://doi.org/10.5194/tc-15-2211-2021>, 2021.
- 526 Palomaki, R. T., and Sproles, E. A.: Quantifying the Effect of River Ice Surface Roughness on Sentinel-1 SAR  
527 Backscatter, *Remote Sensing*, 14(22), 5644, <https://doi.org/10.3390/rs14225644>, 2022.
- 528 Pawłowski, B.: Determinants of change in the duration of ice phenomena on the Vistula River in Toruń, *J. Hydrol.*  
529 *Hydromech.*, 63, 145–153, <http://dx.doi.org/10.1515/johh-2015-0017>, 2015.
- 530 Punzet, J., *Przepływy charakterystyczne* in: Dynowska I., Maciejewski M., (Eds.), *Dorzecze górnej Wisły Część 1*, PWN,  
531 1991. [in Polish]
- 532 Sobiech, J., and Dierking, W.: Observing lake-and river-ice decay with SAR: advantages and limitations of the unsupervised  
533 k-means classification approach, *Ann. Glaciol.*, 54(62), 65-72, 2013.
- 534 Soja, R., and Wiejaczka, Ł.: The impact of a reservoir on the physicochemical properties of water in a mountain river. *Water*  
535 *and Environment Journal*, 28(4), 473-482, <https://doi.org/10.1111/wej.12059>, 2014.
- 536 Starosolszky, Ö.: Effect of river barrages on ice regime, *J Hydraul Res* 28, 711–718.  
537 <https://doi.org/10.1080/00221689009499021>, 1990.
- 538 Stonevicius, E., Uselis, G., and Grendaite, D.: Ice Detection with Sentinel-1 SAR Backscatter Threshold in Long Sections of  
539 Temperate Climate Rivers, *Remote Sensing*, 14(7), 1627, <https://doi.org/10.3390/rs14071627>, 2022.
- 540 Takács, K., and Kern, Z.: Multidecadal changes in the river ice regime of the lower course of the River Drava since AD  
541 1875, *J Hydrol* 529, 1890–1900, <https://doi.org/10.1016/j.jhydrol.2015.01.040>, 2015.
- 542 Takács, K., Kern, Z. and Nagy, B.: Impacts of anthropogenic effects on river ice regime: Examples from Eastern Central  
543 Europe, *Quat. Int.*, 293, 275–282, <https://doi.org/10.1016/j.quaint.2012.12.010>, 2013.
- 544 Thellman, A., Jankowski, K. J., Hayden, B., Yang, X., Dolan, W., Smits, A. P., and O'Sullivan, A. M.: The ecology of river  
545 ice, *J. Geophys. Res. Biogeosci.*, 126(9), <https://doi.org/10.1029/2021JG006275>, 2021.
- 546 Wiejaczka, Ł., Kijowska-Strugała, M., Pierwoła, P., and Nowak, M.: Influence of the Czorsztyn-Sromowce Wyżne  
547 Reservoir complex on the Dunajec River thermal-regime, *Geogr. Pol.*, 88(3), 467-482,  
548 <http://dx.doi.org/10.7163/GPol.0029>, 2015.
- 549 Wiejaczka, Ł.: Wpływ zbiornika wodnego „Klimkówka” na zlodzenie Ropy, in: *Funkcjonowanie środowiska*  
550 *przyrodniczego w okresie przemian gospodarczych w Polsce*, edited by: Bochenek W., and Kijowska M., Szymbark,  
551 172-187, 2009. [in Polish]



552 Wu, Y., Duguay, C. R., and Xu, L.: Assessment of machine learning classifiers for global lake ice cover mapping from  
553 MODIS TOA reflectance data, *Remote Sensing of Environment*, 253, 112206, <https://doi.org/10.1016/j.rse.2020.112206>,  
554 2021.

555 Yang, X., Pavelsky, T. M., and Allen, G. H.: The past and future of global river ice. *Nature*, 577(7788), 69-73,  
556 <https://doi.org/10.1038/s41586-019-1848-1>, 2020.

557

558
